# Supplementary material
Source: PubMed Central journal article supplement (PMC3277676)
Supplement: NIHMS345329-supplement-2.pdf [file NIHMS345329-supplement-2.pdf]

**Supplementary Table 1: Signal transduction molecules that are changed in response to c-Met activation in medulloblastoma cells**

Red = Upregulated, Green = Downregulated in HGF-treated medulloblastoma cells

| Name                            | Cy3 Normalized & Background Subtracted | Cy5 Normalized & Background Subtracted | Cy5/Cy3 Ratio |
|---------------------------------|----------------------------------------|----------------------------------------|---------------|
| Apoptosis Inducing Factor (AIF) | 6073.75                                | 8412.66                                | 1.39          |
| Apoptosis Inducing Factor (AIF) | 5913.91                                | 8609.65                                | 1.46          |
| ARTS                            | 2887.13                                | 4308.04                                | 1.49          |
| ARTS                            | 2852.69                                | 6372.66                                | 2.23          |
| Bcl-x                           | 9465.44                                | 8953.04                                | 0.95          |
| Bcl-x                           | 3556.57                                | 3746.72                                | 1.05          |
| Bcl-xl                          | 8553.93                                | 10364.99                               | 1.21          |
| Bcl-xl                          | 10878.02                               | 13545.96                               | 1.25          |
| Caspase 3                       | 7830.93                                | 9411.75                                | 1.20          |
| Caspase 3                       | 7636.78                                | 9011.38                                | 1.18          |
| Bcl-10                          | 7645.81                                | 6560.91                                | 0.86          |
| Bcl-10                          | 5129.72                                | 5663.86                                | 1.10          |
| Caspase3 active                 | 10268.15                               | 11897.96                               | 1.16          |
| Caspase 3 active                | 9391.23                                | 7936.18                                | 0.85          |
| BSA                             | 4596.74                                | 3741.96                                | 0.81          |
| Positive                        | 33720.06                               | 150682.83                              | 4.47          |
| Caspase4                        | 2314.52                                | 3422.99                                | 1.48          |
| Caspase4                        | 1933.33                                | 2825.53                                | 1.46          |
| Caspase 4 (mono)                | 3327.51                                | 2423.68                                | 0.73          |
| Caspase 4 (mono)                | 3273.82                                | 2646.03                                | 0.81          |
| Caspase 5                       | 5133.13                                | 6705.80                                | 1.31          |
| Caspase 5                       | 7028.15                                | 8164.29                                | 1.16          |
| Caspase 6                       | 4487.40                                | 4418.39                                | 0.98          |
| Caspase 6                       | 4295.34                                | 3812.83                                | 0.89          |
| Caspase 7                       | 4487.60                                | 4243.24                                | 0.95          |
| Caspase 7                       | 4963.43                                | 7708.86                                | 1.55          |
| Caspase 8                       | 3135.78                                | 4803.93                                | 1.53          |
| Caspase8                        | 2193.80                                | 2506.17                                | 1.14          |
| Caspase 8 (poly)                | 8416.02                                | 7288.24                                | 0.87          |
| Caspase 8 (poly)                | 8667.56                                | 6874.75                                | 0.79          |
| BSA                             | 550.31                                 | 1431.02                                | 2.60          |
| Positive                        | 24823.19                               | 149831.12                              | 6.04          |
| Procaspase 8                    | 7875.51                                | 5655.75                                | 0.72          |
| Procaspase 8                    | 7590.52                                | 6786.78                                | 0.89          |
| Caspase 9                       | 9368.95                                | 5527.13                                | 0.59          |
| Caspase 9                       | 8258.78                                | 5197.76                                | 0.63          |
| Caspase10                       | 5732.20                                | 6117.35                                | 1.07          |
| Caspase 10                      | 4509.23                                | 4075.61                                | 0.90          |
| Caspase 10                      | 4145.41                                | 3901.76                                | 0.94          |
| Caspase 10                      | 3972.81                                | 4797.53                                | 1.21          |
| Caspase 11                      | 6091.82                                | 8395.93                                | 1.38          |
| Caspase 11                      | 5219.09                                | 7184.72                                | 1.38          |
| Caspase12                       | 7275.73                                | 4775.52                                | 0.66          |
| Caspase12                       | 7140.93                                | 4405.69                                | 0.62          |
| Cathapsin D                     | 3050.10                                | 1925.46                                | 0.63          |
| Cathapsin D                     | 3586.28                                | 2256.86                                | 0.63          |

|                 |          |           |       |
|-----------------|----------|-----------|-------|
| BSA             | 195.88   | 3723.78   | 19.01 |
| Positive        | 35334.55 | 137981.56 | 3.91  |
| Cystatin A      | 5741.42  | 6065.58   | 1.06  |
| Cystatin A      | 5657.92  | 5715.37   | 1.01  |
| DAXX            | 5846.90  | 4396.51   | 0.75  |
| DAXX            | 4672.25  | 4753.70   | 1.02  |
| DAPK            | 3628.35  | 3151.38   | 0.87  |
| DAPK            | 3345.09  | 3626.71   | 1.08  |
| DAPK pSer308    | 2549.98  | 2442.93   | 0.96  |
| DAPK pSer308    | 2173.57  | 2983.83   | 1.37  |
| GADD 153        | 4057.31  | 3833.20   | 0.94  |
| GADD 153        | 4389.83  | 4272.66   | 0.97  |
| PAR4            | 10031.72 | 8430.05   | 0.84  |
| PAR4            | 9431.28  | 7040.98   | 0.75  |
| PSR             | 4192.98  | 7148.14   | 1.70  |
| PSR             | 4082.55  | 3814.70   | 0.93  |
| BSA             | 728.08   | 997.07    | 1.37  |
| Positive        | 39437.71 | 132050.93 | 3.35  |
| SMAC/DIABLO     | 10102.40 | 9720.33   | 0.96  |
| SMAC/DIABLO     | 10389.67 | 10425.96  | 1.00  |
| c-Abl           | 4895.73  | 6210.20   | 1.27  |
| c-Abl           | 4357.24  | 5019.17   | 1.15  |
| cdc25           | 4564.90  | 7772.41   | 1.70  |
| cdc25           | 5448.91  | 9234.79   | 1.69  |
| cdc27           | 12745.10 | 10791.39  | 0.85  |
| cdc27           | 12176.46 | 12100.82  | 0.99  |
| cdc6            | 9964.05  | 9771.55   | 0.98  |
| cdc6            | 9799.02  | 6834.14   | 0.70  |
| cdh1            | 6955.08  | 5769.77   | 0.83  |
| cdh1            | 8560.12  | 7406.29   | 0.87  |
| cdk4            | 5550.63  | 7545.86   | 1.36  |
| cdk4            | 5425.45  | 5574.60   | 1.03  |
| BSA             | 571.18   | 3226.07   | 5.65  |
| Positive        | 40853.86 | 174380.66 | 4.27  |
| cdk6            | 3018.68  | 4152.77   | 1.38  |
| cdk6            | 3374.52  | 3945.17   | 1.17  |
| cdk7            | 7121.93  | 6067.07   | 0.85  |
| cdk7            | 5337.82  | 5761.11   | 1.08  |
| chk1            | 10145.44 | 6957.85   | 0.69  |
| chk1            | 10152.49 | 10587.23  | 1.04  |
| chk2            | 7061.20  | 5689.53   | 0.81  |
| chk2            | 8192.68  | 8527.65   | 1.04  |
| c-Myc           | 3627.81  | 3350.40   | 0.92  |
| c-Myc           | 3812.72  | 3737.60   | 0.98  |
| c-Myc (mono)    | 7591.83  | 5295.06   | 0.70  |
| c-Myc (mono)    | 6709.52  | 5271.47   | 0.79  |
| E2F1            | 11406.00 | 12421.94  | 1.09  |
| E2F1            | 4021.81  | 5164.64   | 1.28  |
| BSA             | 781.95   | 891.64    | 1.14  |
| Positive        | 25847.13 | 145361.44 | 5.62  |
| Cyclin A (poly) | 4877.86  | 6543.17   | 1.34  |
| Cyclin A (poly) | 4489.28  | 4883.32   | 1.09  |

|                 |          |           |       |
|-----------------|----------|-----------|-------|
| Cyclin A (mono) | 4200.13  | 4097.29   | 0.98  |
| Cyclin A (mono) | 5012.24  | 15607.55  | 3.11  |
| Cyclin B1       | 7384.47  | 8688.92   | 1.18  |
| Cyclin B1       | 8480.42  | 8343.86   | 0.98  |
| Cyclin D1       | 682.84   | 1857.05   | 2.72  |
| Cyclin D1       | 716.03   | 8603.61   | 12.02 |
| Cyclin D2       | 6247.69  | 7465.69   | 1.19  |
| Cyclin D2       | 6368.17  | 4749.46   | 0.75  |
| Cyclin D3       | 5135.85  | 6264.03   | 1.22  |
| Cyclin D3       | 4941.57  | 7234.10   | 1.46  |
| MDM2            | 13406.22 | 10385.23  | 0.77  |
| MDM2            | 14299.43 | 10862.69  | 0.76  |
| BSA             | 998.31   | 9916.51   | 9.93  |
| Positive        | 28736.19 | 147282.16 | 5.13  |
| p14             | 5519.74  | 4315.08   | 0.78  |
| p14             | 4030.06  | 3480.97   | 0.86  |
| p16             | 3352.99  | 6770.18   | 2.02  |
| p16             | 2316.74  | 6670.92   | 2.88  |
| p19             | 9711.44  | 4475.47   | 0.46  |
| p19             | 9992.07  | 4375.77   | 0.44  |
| p21             | 5869.56  | 5286.63   | 0.90  |
| p21             | 6866.69  | 11609.86  | 1.69  |
| p34             | 5409.77  | 4769.32   | 0.88  |
| p34             | 5571.59  | 5575.85   | 1.00  |
| p35             | 13715.84 | 10197.37  | 0.74  |
| p35             | 8936.36  | 7244.63   | 0.81  |
| p53             | 8638.87  | 12677.23  | 1.47  |
| p53             | 4721.01  | 4975.51   | 1.05  |
| BSA             | 488.19   | 3072.63   | 6.29  |
| Positive        | 24927.71 | 121787.86 | 4.89  |
| p57             | 9278.77  | 8307.20   | 0.90  |
| p57             | 12071.08 | 10271.16  | 0.85  |
| p63             | 10635.04 | 10078.18  | 0.95  |
| p63             | 9920.69  | 10780.38  | 1.09  |
| Rb pSer795      | 3652.39  | 2382.41   | 0.65  |
| Rb pSer795      | 6979.79  | 6081.73   | 0.87  |
| Smad4           | 8362.66  | 11354.36  | 1.36  |
| Smad4           | 6065.07  | 10309.30  | 1.70  |
| AP-1/cJUN       | 4640.62  | 6831.46   | 1.47  |
| AP-1/cJUN       | 4707.38  | 4693.68   | 1.00  |
| ATF2            | 4960.12  | 8273.38   | 1.67  |
| ATF2            | 4555.52  | 8993.89   | 1.97  |
| CUG-BP1         | 9376.96  | 6365.83   | 0.68  |
| CUG-BP1         | 9924.80  | 8300.44   | 0.84  |
| BSA             | 453.39   | 754.52    | 1.66  |
| Positive        | 36307.86 | 165433.72 | 4.56  |
| HAT1            | 4072.32  | 4658.14   | 1.14  |
| HAT1            | 4179.27  | 4700.65   | 1.12  |
| HDAC1           | 9946.97  | 8575.74   | 0.86  |
| HDAC1           | 9857.14  | 9736.46   | 0.99  |
| HDAC2           | 9899.84  | 8896.66   | 0.90  |
| HDAC2           | 9949.36  | 9576.18   | 0.96  |

|                              |          |           |      |
|------------------------------|----------|-----------|------|
| HDAC4                        | 4517.90  | 4126.17   | 0.91 |
| HDAC4                        | 4675.13  | 6911.17   | 1.48 |
| SUV39H1                      | 4975.94  | 6292.26   | 1.26 |
| SUV39H1                      | 4944.55  | 5956.61   | 1.20 |
| PCAF                         | 4809.59  | 4323.65   | 0.90 |
| PCAF                         | 18767.17 | 22198.29  | 1.18 |
| hnRNP M3-M4                  | 9458.22  | 7102.99   | 0.75 |
| hnRNP M3-M4                  | 10036.49 | 10369.02  | 1.03 |
| BSA                          | 334.43   | 690.50    | 2.06 |
| Positive                     | 35643.29 | 158121.76 | 4.44 |
| pHistone H3-pSer10           | 9106.77  | 7941.07   | 0.87 |
| pHistone H3-pSer10           | 10943.36 | 9980.60   | 0.91 |
| pHistone H3-pSer28           | 4881.97  | 5028.54   | 1.03 |
| pHistone H3-pSer28           | 8656.55  | 7904.72   | 0.91 |
| Acetyl and Phospho Histone 3 | 9358.73  | 9675.57   | 1.03 |
| Acetyl and Phospho Histone 3 | 8945.87  | 11047.49  | 1.23 |
| Acetyl Histone 3-Ac-Lys 9    | 11000.53 | 11933.94  | 1.08 |
| Acetyl Histone 3-Ac-Lys 9    | 5824.01  | 5147.21   | 0.88 |
| RAN                          | 9841.33  | 8392.03   | 0.85 |
| RAN                          | 9297.06  | 8740.51   | 0.94 |
| NTF2                         | 3416.78  | 4529.23   | 1.33 |
| NTF2                         | 4636.88  | 4572.64   | 0.99 |
| Topoisomerase 1              | 3186.46  | 7684.19   | 2.41 |
| Topoisomerase 1              | 3443.42  | 6153.41   | 1.79 |
| BSA                          | 593.21   | 3559.60   | 6.00 |
| Positive                     | 40968.26 | 164762.45 | 4.02 |
| TRF1                         | 4644.65  | 4356.14   | 0.94 |
| TRF1                         | 4467.07  | 6249.95   | 1.40 |
| Aop-1                        | 3508.66  | 4199.50   | 1.20 |
| Aop-1                        | 3795.04  | 4950.82   | 1.30 |
| HSP70                        | 1046.64  | 870.15    | 0.83 |
| HSP70                        | 1769.75  | 1479.90   | 0.84 |
| HSP90                        | 1747.33  | 1572.92   | 0.90 |
| HSP90                        | 4709.79  | 14171.24  | 3.01 |
| Nedd8                        | 12736.56 | 9957.37   | 0.78 |
| Nedd8                        | 13545.09 | 12112.84  | 0.89 |
| Calcineurin                  | 8720.11  | 3057.18   | 0.35 |
| Calcineurin                  | 10510.90 | 5702.08   | 0.54 |
| Calmodulin                   | 4583.30  | 6479.57   | 1.41 |
| Calmodulin                   | 5077.43  | 6584.19   | 1.30 |
| BSA                          | 751.44   | 906.23    | 1.21 |
| Positive                     | 21247.25 | 114783.57 | 5.40 |
| Calnexin                     | 9366.78  | 11269.87  | 1.20 |
| Calnexin                     | 7217.28  | 13738.63  | 1.90 |
| Calponin                     | 11253.99 | 9730.79   | 0.86 |
| Calponin                     | 9995.13  | 10593.88  | 1.06 |
| Calreticulin                 | 7586.72  | 6700.55   | 0.88 |
| Calreticulin                 | 8462.93  | 10863.77  | 1.28 |
| Actin                        | 8792.44  | 8374.44   | 0.95 |
| Actin                        | 8947.54  | 9380.29   | 1.05 |
| Actin mono.                  | 10707.07 | 13252.68  | 1.24 |
| Actin mono.                  | 4224.01  | 5544.56   | 1.31 |

|                    |          |           |      |
|--------------------|----------|-----------|------|
| b-Actin mono.      | 5405.08  | 5140.11   | 0.95 |
| b-Actin mono.      | 6542.95  | 4109.58   | 0.63 |
| Actopaxin          | 8587.21  | 8802.52   | 1.03 |
| Actopaxin          | 9305.07  | 9463.45   | 1.02 |
| BSA                | 1183.19  | 2487.14   | 2.10 |
| Positive           | 43772.19 | 178891.12 | 4.09 |
| Adaptin            | 3881.23  | 6082.68   | 1.57 |
| Adaptin            | 3584.31  | 4180.96   | 1.17 |
| bCOP               | 11524.46 | 9126.19   | 0.79 |
| bCOP               | 10577.03 | 8237.97   | 0.78 |
| aCatenin           | 5168.21  | 9118.02   | 1.76 |
| aCatenin           | 4645.88  | 8039.32   | 1.73 |
| bCatenin           | 8731.91  | 5836.12   | 0.67 |
| aCatenin           | 8144.76  | 9115.06   | 1.12 |
| Plakoglobin        | 6981.02  | 4460.96   | 0.64 |
| Plakoglobin        | 8184.88  | 7078.45   | 0.86 |
| Caveolin1          | 9480.33  | 7644.24   | 0.81 |
| Caveolin1          | 9089.12  | 7450.96   | 0.82 |
| Clathrin l.c.      | 11963.90 | 9219.94   | 0.77 |
| Clathrin l.c.      | 12037.98 | 9361.31   | 0.78 |
| BSA                | 7462.00  | 5168.14   | 0.69 |
| Positive           | 40887.62 | 163381.73 | 4.00 |
| Connexin 32        | 4412.75  | 3864.37   | 0.88 |
| Connexin 32        | 11530.04 | 16140.04  | 1.40 |
| Connexin 32 (mono) | 7169.26  | 6405.00   | 0.89 |
| Connexin 32 mono   | 9196.59  | 9180.52   | 1.00 |
| Connexin 43        | 5882.77  | 8485.73   | 1.44 |
| Connexin 43        | 5138.43  | 6842.41   | 1.33 |
| cytokeratin 8.12   | 1737.91  | 1132.31   | 0.65 |
| cytokeratin 8.12   | 2182.74  | 2549.35   | 1.17 |
| cytokeratin 8.60   | 4702.39  | 4760.56   | 1.01 |
| cytokeratin 8.60   | 4501.41  | 5214.18   | 1.16 |
| cytokeratin 19     | 3442.39  | 4347.18   | 1.26 |
| cytokeratin 19     | 3668.55  | 5275.90   | 1.44 |
| cytokeratin 4      | 4001.48  | 4666.76   | 1.17 |
| cytokeratin 4      | 3864.55  | 5357.62   | 1.39 |
| BSA                | 514.18   | 773.53    | 1.50 |
| Positive           | 43910.87 | 162722.81 | 3.71 |
| cytokeratin 7      | 2625.34  | 3410.42   | 1.30 |
| cytokeratin 7      | 2801.51  | 3951.15   | 1.41 |
| cytokeratin 8.13   | 2621.30  | 2404.49   | 0.92 |
| cytokeratin 8.13   | 3024.52  | 5239.41   | 1.73 |
| cytokeratin 13     | 4188.53  | 3961.65   | 0.95 |
| cytokeratin 13     | 5422.29  | 6284.85   | 1.16 |
| cytokeratin 18     | 4365.56  | 4387.21   | 1.00 |
| cytokeratin 18     | 3897.83  | 3710.93   | 0.95 |
| pan Cytokeratin    | 10331.26 | 13385.63  | 1.30 |
| pan Cytokeratin    | 10581.23 | 8212.06   | 0.78 |
| Desmin             | 8327.23  | 7494.84   | 0.90 |
| Desmin             | 7509.74  | 7130.87   | 0.95 |
| Dystrophin         | 2413.44  | 5032.37   | 2.09 |
| Dystrophin         | 2987.60  | 6037.92   | 2.02 |

|                           |          |           |      |
|---------------------------|----------|-----------|------|
| Positive                  | 25276.97 | 129828.30 | 5.14 |
| Positive                  | 24059.33 | 99669.45  | 4.14 |
| Ezrin                     | 7440.65  | 6774.00   | 0.91 |
| Ezrin                     | 7668.61  | 9946.21   | 1.30 |
| Fibronectin               | 8042.10  | 9058.35   | 1.13 |
| Fibronectin               | 7375.01  | 6315.20   | 0.86 |
| Internexin                | 5750.61  | 5633.86   | 0.98 |
| Internexin                | 5560.67  | 8133.76   | 1.46 |
| MAP1                      | 8385.48  | 9944.12   | 1.19 |
| MAP1                      | 7748.91  | 6634.94   | 0.86 |
| MAP1b                     | 16567.81 | 10891.78  | 0.66 |
| MAP1b                     | 15405.88 | 10913.99  | 0.71 |
| MAP2                      | 2969.70  | 2311.17   | 0.78 |
| MAP2                      | 2876.65  | 3103.95   | 1.08 |
| OP18/Stathmin             | 11436.55 | 9826.30   | 0.86 |
| OP18/Stathmin             | 10853.33 | 12875.12  | 1.19 |
| BSA                       | 1699.27  | 1145.79   | 0.67 |
| Positive                  | 34347.24 | 132524.87 | 3.86 |
| Myosin IIA                | 3050.53  | 10405.13  | 3.41 |
| Myosin IIA                | 3072.09  | 3095.07   | 1.01 |
| myosin Va                 | 3860.16  | 4100.63   | 1.06 |
| myosin Va                 | 3748.20  | 3718.43   | 0.99 |
| Pan Cadherin              | 12333.90 | 16831.43  | 1.36 |
| Pan Cadherin              | 7652.44  | 6570.46   | 0.86 |
| Spectrin                  | 3252.96  | 4401.72   | 1.35 |
| Spectrin                  | 2638.76  | 4471.22   | 1.69 |
| Tropomyosin               | 9024.80  | 7976.28   | 0.88 |
| Tropomyosin               | 9033.10  | 8929.05   | 0.99 |
| Vinculin                  | 1670.35  | 1934.66   | 1.16 |
| Vinculin                  | 1636.93  | 2643.50   | 1.61 |
| Chondroitin Sulfate       | 4290.99  | 6218.11   | 1.45 |
| Chondroitin Sulfate       | 4244.46  | 6401.57   | 1.51 |
| BSA                       | 490.17   | 1001.84   | 2.04 |
| Positive                  | 35919.36 | 125409.24 | 3.49 |
| aTubulin                  | 11388.75 | 9102.96   | 0.80 |
| aTubulin                  | 9979.04  | 8788.58   | 0.88 |
| bTubulin I                | 12240.72 | 10354.85  | 0.85 |
| bTubulin I                | 11030.21 | 10137.93  | 0.92 |
| bTubulin III              | 10778.78 | 7893.71   | 0.73 |
| bTubulin III              | 10287.02 | 8467.81   | 0.82 |
| bTubulin IV               | 13326.90 | 9186.03   | 0.69 |
| bTubulin IV               | 12898.23 | 9236.09   | 0.72 |
| bTubulin polyglutamylated | 7709.06  | 8569.03   | 1.11 |
| bTubulin polyglutamylated | 8016.26  | 8914.26   | 1.11 |
| g Tubulin                 | 11126.56 | 9100.46   | 0.82 |
| g Tubulin                 | 11683.06 | 9833.67   | 0.84 |
| a1 Syntrophin             | 8131.49  | 7773.89   | 0.96 |
| a1 Syntrophin             | 8435.06  | 8273.15   | 0.98 |
| BSA                       | 454.14   | 1594.81   | 3.51 |
| Positive                  | 44360.93 | 138284.22 | 3.12 |
| i-NOS                     | 11309.54 | 9601.21   | 0.85 |
| i-NOS                     | 11405.25 | 9901.16   | 0.87 |

|                                     |          |           |      |
|-------------------------------------|----------|-----------|------|
| i-NOS (mono)                        | 10081.05 | 5817.56   | 0.58 |
| i-NOS (mono)                        | 34049.19 | 19778.41  | 0.58 |
| b-NOS                               | 10845.92 | 8199.06   | 0.76 |
| b-NOS                               | 11319.29 | 10579.81  | 0.93 |
| b-NOS (mono)                        | 10918.13 | 10499.79  | 0.96 |
| b-NOS (mono)                        | 8371.78  | 8068.45   | 0.96 |
| e-NOS                               | 12267.62 | 11144.64  | 0.91 |
| e-NOS                               | 12166.38 | 13941.00  | 1.15 |
| e-NOS                               | 13316.82 | 12934.90  | 0.97 |
| e-NOS                               | 7186.45  | 5687.45   | 0.79 |
| e-NOS (mono)                        | 4218.51  | 6551.61   | 1.55 |
| e-NOS (mono)                        | 3840.79  | 4909.68   | 1.28 |
| BSA                                 | 1271.97  | 2132.65   | 1.68 |
| Positive                            | 20539.21 | 61715.67  | 3.00 |
| Amyloid Precursor Protein (APP)     | 12103.46 | 9707.50   | 0.80 |
| Amyloid Precursor Protein (APP)     | 12528.20 | 10120.43  | 0.81 |
| Amyloid Precursor Protein (APP)     | 11179.84 | 8886.01   | 0.79 |
| Amyloid Precursor Protein (APP)     | 11190.31 | 8864.15   | 0.79 |
| CNPase                              | 8051.54  | 9461.73   | 1.18 |
| CNPase                              | 8026.16  | 9530.78   | 1.19 |
| Cofilin                             | 10178.17 | 9420.53   | 0.93 |
| Cofilin                             | 9613.15  | 9105.97   | 0.95 |
| DOPA Decarboxylase                  | 9545.50  | 12349.04  | 1.29 |
| DOPA Decarboxylase                  | 8431.43  | 7614.14   | 0.90 |
| Dystrophin                          | 10356.70 | 19532.17  | 1.89 |
| Dystrophin                          | 9534.52  | 9248.49   | 0.97 |
| Glutamate receptor NMDAR 2a         | 5981.65  | 6987.08   | 1.17 |
| Glutamate receptor NMDAR 2a         | 11062.12 | 11457.41  | 1.04 |
| BSA                                 | 617.39   | 1938.33   | 3.14 |
| Positive                            | 35262.01 | 125226.80 | 3.55 |
| Glutamic Acid Decarboxylase (GAD67) | 11374.84 | 8833.42   | 0.78 |
| Glutamic Acid Decarboxylase (GAD67) | 11449.34 | 8786.60   | 0.77 |
| Glutamine Synthetase                | 9443.00  | 7911.07   | 0.84 |
| Glutamine Synthetase                | 9176.19  | 8386.32   | 0.91 |
| Nerve growth factor receptor (NGF)  | 11362.06 | 12277.14  | 1.08 |
| Nerve growth factor receptor (NGF)  | 4493.67  | 4246.25   | 0.94 |
| Nerve growth factor receptor        | 2116.76  | 2468.05   | 1.17 |
| Nerve growth factor receptor        | 2766.22  | 3555.60   | 1.29 |
| KIF3A                               | 10229.77 | 8567.33   | 0.84 |
| KIF3A                               | 10253.96 | 8577.45   | 0.84 |
| Nicastrin                           | 10885.78 | 8179.37   | 0.75 |
| Nicastrin                           | 10539.44 | 7786.36   | 0.74 |
| SNAP-25                             | 9904.89  | 8835.64   | 0.89 |
| SNAP-25                             | 9334.23  | 7926.68   | 0.85 |
| BSA                                 | 724.65   | 1588.34   | 2.19 |
| Positive                            | 28900.13 | 96598.08  | 3.34 |
| S-100 b                             | 7048.98  | 7665.00   | 1.09 |
| S-100 b                             | 7905.36  | 8313.82   | 1.05 |
| S-100                               | 9384.62  | 8234.40   | 0.88 |
| S-100                               | 10253.14 | 7135.98   | 0.70 |
| Neurofilament 200                   | 9068.64  | 7392.57   | 0.82 |
| Neurofilament 200                   | 9713.97  | 8035.67   | 0.83 |

|                         |          |           |      |
|-------------------------|----------|-----------|------|
| Neurofilament 200       | 5704.90  | 6075.75   | 1.07 |
| Neurofilament 200       | 4695.39  | 6354.83   | 1.35 |
| Synaptotagmin           | 8895.59  | 7564.11   | 0.85 |
| Synaptotagmin           | 9304.20  | 8631.68   | 0.93 |
| Syntaxin                | 9370.21  | 5521.89   | 0.59 |
| Syntaxin                | 9542.06  | 6478.36   | 0.68 |
| Synuclein               | 9491.57  | 7683.21   | 0.81 |
| Synuclein               | 9533.11  | 8219.04   | 0.86 |
| BSA                     | 561.82   | 1625.79   | 2.89 |
| Positive                | 39788.59 | 123998.99 | 3.12 |
| Synuclein (mono)        | 7279.94  | 11882.48  | 1.63 |
| Synuclein (mono)        | 8612.47  | 13093.93  | 1.52 |
| Tyrosin Hydroxylase     | 3324.17  | 5523.33   | 1.66 |
| Tyrosin Hydroxylase     | 3274.63  | 4932.23   | 1.51 |
| Tau-pSer199/202         | 1830.94  | 2451.18   | 1.34 |
| Tau-pSer199/202         | 1669.73  | 1589.50   | 0.95 |
| p120CTN                 | 12130.41 | 10622.68  | 0.88 |
| p120CTN                 | 12236.98 | 11177.26  | 0.91 |
| Tryptophane Hydroxylase | 11409.20 | 9013.18   | 0.79 |
| Tryptophane Hydroxylase | 11372.65 | 13296.46  | 1.17 |
| ARNO                    | 16223.77 | 26931.56  | 1.66 |
| ARNO                    | 11066.13 | 8221.21   | 0.74 |
| GAP1                    | 6524.99  | 5926.92   | 0.91 |
| GAP1                    | 6572.34  | 7571.14   | 1.15 |
| BSA                     | 975.79   | 4626.92   | 4.74 |
| Positive                | 32350.25 | 110331.22 | 3.41 |
| GRP1(ARNO3)             | 9508.04  | 9500.77   | 1.00 |
| GRP1(ARNO3)             | 10088.19 | 9382.55   | 0.93 |
| Crk-L                   | 10399.72 | 9008.36   | 0.87 |
| Crk-L                   | 10401.96 | 8935.19   | 0.86 |
| CAM Kinase II           | 9820.83  | 9341.58   | 0.95 |
| CAM Kinase II           | 10174.09 | 9261.35   | 0.91 |
| CAM Kinase IV           | 10384.82 | 8995.84   | 0.87 |
| CAM Kinase IV           | 10621.73 | 8845.70   | 0.83 |
| EGF Receptor            | 9388.76  | 10264.25  | 1.09 |
| EGF Receptor            | 9156.29  | 10037.06  | 1.10 |
| Estrogen Receptor       | 12639.97 | 9350.78   | 0.74 |
| Estrogen Receptor       | 12967.99 | 9390.41   | 0.72 |
| ERK5                    | 9286.03  | 8870.14   | 0.96 |
| ERK5                    | 9388.68  | 7936.08   | 0.85 |
| BSA                     | 5186.39  | 11008.98  | 2.12 |
| Positive                | 29068.30 | 95513.62  | 3.29 |
| FAK                     | 10076.09 | 8618.14   | 0.86 |
| FAK                     | 10192.34 | 8195.22   | 0.80 |
| FAK-pSer772             | 4057.97  | 3338.37   | 0.82 |
| FAK-pSer772             | 3708.99  | 3216.18   | 0.87 |
| FAK-pSer910             | 3182.66  | 2210.66   | 0.69 |
| FAK-pSer910             | 2482.73  | 4712.07   | 1.90 |
| FAK-pTyr577             | 1511.85  | 3985.70   | 2.64 |
| FAK-pTyr577             | 1323.10  | 4835.72   | 3.65 |
| FAK-pTyr397             | 948.71   | 1250.22   | 1.32 |
| FAK-pTyr397             | 1082.13  | 1235.83   | 1.14 |



|                                 |          |           |      |
|---------------------------------|----------|-----------|------|
| Grb-2                           | 18544.99 | 13379.72  | 0.72 |
| Grb-2                           | 18588.11 | 13347.83  | 0.72 |
| IkB a                           | 8702.87  | 8451.46   | 0.97 |
| IkB a                           | 8350.83  | 6130.71   | 0.73 |
| BSA                             | 1020.92  | 2259.58   | 2.21 |
| Positive                        | 33617.39 | 115406.17 | 3.43 |
| NAK                             | 7775.35  | 5151.52   | 0.66 |
| NAK                             | 4681.79  | 5725.05   | 1.22 |
| NFkB                            | 4120.79  | 3062.15   | 0.74 |
| NFkB                            | 5033.66  | 5873.08   | 1.17 |
| JNK                             | 3689.51  | 3254.05   | 0.88 |
| JNK                             | 2484.06  | 2921.71   | 1.18 |
| JNK activated diphospo          | 12276.05 | 8384.95   | 0.68 |
| JNK activated diphospo          | 13244.88 | 9718.94   | 0.73 |
| p38 MAPK                        | 10649.76 | 7607.73   | 0.71 |
| p38 MAPK                        | 11381.52 | 8367.85   | 0.74 |
| p38 MAPK activated              | 9696.09  | 10694.08  | 1.10 |
| p38 MAPK activated              | 10779.89 | 12033.46  | 1.12 |
| Mcl-1                           | 9898.97  | 7602.60   | 0.77 |
| Mcl-1                           | 9846.58  | 8099.34   | 0.82 |
| BSA                             | 1655.99  | 10020.56  | 6.05 |
| Positive                        | 32300.82 | 107132.99 | 3.32 |
| MAP Kinase(Erk1+Erk2)           | 3537.78  | 4985.11   | 1.41 |
| MAP Kinase (Erk1+Erk2)          | 3452.66  | 5373.66   | 1.56 |
| MAP Kinase (Erk1)               | 12756.10 | 10690.99  | 0.84 |
| MAP Kinase (Erk1)               | 13163.85 | 11246.26  | 0.85 |
| MAP Kinase activated diphospho  | 9007.83  | 5551.79   | 0.62 |
| MAP Kinase activated diphospho  | 9533.54  | 10434.97  | 1.09 |
| MAP Kinase activated phosphoth  | 13665.87 | 12506.83  | 0.92 |
| MAP Kinase activated phosphoth  | 13212.64 | 11862.12  | 0.90 |
| MAP Kinase activated phosphoty  | 11992.71 | 11143.96  | 0.93 |
| MAP Kinase activated phosphoty  | 11554.13 | 11506.67  | 1.00 |
| MAPK non phosphorylated         | 8400.53  | 5554.28   | 0.66 |
| MAPK non phosphorylated         | 7688.99  | 5142.35   | 0.67 |
| MAPK activated protein kinase-2 | 11387.18 | 9109.33   | 0.80 |
| MAPK activated protein kinase-2 | 11159.83 | 11061.73  | 0.99 |
| BSA                             | 743.85   | 2994.31   | 4.03 |
| Positive                        | 30604.37 | 104192.71 | 3.40 |
| Cdc7 Kinase                     | 7300.87  | 11017.44  | 1.51 |
| Cdc7 Kinase                     | 7353.83  | 7413.54   | 1.01 |
| PAK-pSer212                     | 9314.88  | 9002.33   | 0.97 |
| PAK-pSer212                     | 8988.64  | 8511.67   | 0.95 |
| Phospolipase A2 group V         | 5967.43  | 7192.93   | 1.21 |
| Phospolipase A2 group V         | 17316.74 | 10546.54  | 0.61 |
| Phospolipase c g 1              | 5808.10  | 11796.23  | 2.03 |
| Phospolipase c g 1              | 3809.97  | 5898.32   | 1.55 |
| Phosphoserine                   | 20253.23 | 18645.68  | 0.92 |
| Phosphoserine                   | 21639.99 | 19557.29  | 0.90 |
| Phosphotyrosine                 | 13616.55 | 10311.11  | 0.76 |
| Phosphotyrosine                 | 14029.35 | 10561.75  | 0.75 |
| Phosphothronine                 | 13479.15 | 19487.84  | 1.45 |
| Phosphothronine                 | 13308.35 | 18067.70  | 1.36 |

|                       |          |           |      |
|-----------------------|----------|-----------|------|
| BSA                   | 1142.55  | 2237.73   | 1.96 |
| Positive              | 37794.25 | 120328.64 | 3.18 |
| PKB/AKT (mono)        | 6155.88  | 4863.64   | 0.79 |
| PKB/AKT (mono)        | 6469.54  | 3169.27   | 0.49 |
| PKB/AKT               | 11508.83 | 8056.19   | 0.70 |
| PKB/AKT               | 11011.39 | 7995.43   | 0.73 |
| PKB-pSer 473          | 11397.02 | 8739.65   | 0.77 |
| PKB-pSer 473          | 10805.46 | 8340.75   | 0.77 |
| PKB-pThr 308          | 8840.17  | 8153.65   | 0.92 |
| PKB-pThr 308          | 8148.67  | 6841.31   | 0.84 |
| PKC a                 | 2947.71  | 5343.38   | 1.81 |
| PKC a                 | 2575.34  | 4131.70   | 1.60 |
| PKC b                 | 5244.60  | 5851.24   | 1.12 |
| PKC b                 | 1572.98  | 2240.67   | 1.42 |
| PKC g                 | 1648.73  | 2352.52   | 1.43 |
| PKC g                 | 1339.96  | 2650.49   | 1.98 |
| BSA                   | 450.32   | 662.21    | 1.47 |
| Positive              | 37726.05 | 132685.50 | 3.52 |
| PKC g (mono)          | 8868.40  | 7953.42   | 0.90 |
| PKC g (mono)          | 9106.91  | 8366.39   | 0.92 |
| PKD                   | 9523.29  | 15987.96  | 1.68 |
| PKD                   | 10161.26 | 8666.48   | 0.85 |
| MAPK Phosphatase-1    | 9167.73  | 7717.09   | 0.84 |
| MAPK Phosphatase-1    | 9216.97  | 8989.68   | 0.98 |
| Protein phosphatase 1 | 9429.13  | 7385.22   | 0.78 |
| Protein phosphatase 1 | 10272.67 | 10971.17  | 1.07 |
| PTEN                  | 10822.96 | 8328.92   | 0.77 |
| PTEN                  | 11107.66 | 8874.98   | 0.80 |
| PTEN (mono)           | 12283.47 | 17271.24  | 1.41 |
| PTEN (mono)           | 8787.69  | 22928.37  | 2.61 |
| SGK                   | 8630.48  | 6903.12   | 0.80 |
| SGK                   | 8563.64  | 6122.50   | 0.71 |
| BSA                   | 1455.98  | 3060.29   | 2.10 |
| Positive              | 33717.25 | 112096.45 | 3.32 |
| Pyk2                  | 5227.65  | 5061.56   | 0.97 |
| Pyk2                  | 5350.40  | 4865.42   | 0.91 |
| Pyk2 - pTyr579        | 9636.21  | 8764.94   | 0.91 |
| Pyk2 - pTyr579        | 2234.94  | 5141.35   | 2.30 |
| Pyk 2- pTyr579/580)   | 5002.70  | 3541.53   | 0.71 |
| Pyk 2- pTyr579/580)   | 4841.67  | 4061.76   | 0.84 |
| Pyk2 - pTyr580        | 2276.80  | 2757.63   | 1.21 |
| Pyk2 - pTyr580        | 2068.51  | 1904.59   | 0.92 |
| Pyk2 - pTyr881        | 4725.69  | 4339.14   | 0.92 |
| Pyk2 - pTyr881        | 5730.86  | 7022.06   | 1.23 |
| RAF                   | 10452.60 | 8222.57   | 0.79 |
| RAF                   | 10363.69 | 10560.08  | 1.02 |
| RAF-pSer621           | 4767.30  | 5444.90   | 1.14 |
| RAF-pSer621           | 2410.16  | 4169.09   | 1.73 |
| Positive              | 22880.57 | 83362.24  | 3.64 |
| Positive              | 31674.09 | 102373.35 | 3.23 |
